# Supplementary material
Source: PubMed Central journal article supplement (PMC4402147)
Supplement: NIHMS668522-supplement-1.pdf [file NIHMS668522-supplement-1.pdf]

## SUPPLEMENTARY INFORMATION

### **Monitoring methionine sulfoxide with stereospecific mechanism-based fluorescent sensors**

Lionel Tarrago<sup>1,3#</sup>, Zalán Péterfi<sup>1#</sup>, Byung Cheon Lee<sup>1,4</sup>, Thomas Michel<sup>2</sup> and Vadim N. Gladyshev<sup>1\*</sup>

<sup>1</sup> Division of Genetics, Department of Medicine, Brigham & Women's Hospital and Harvard Medical School, Boston, Massachusetts 02115, USA

<sup>2</sup> Cardiovascular Division, Department of Medicine, Brigham and Women's Hospital, Harvard Medical School, Boston, MA 02115, USA

<sup>3</sup> Present address: Aix Marseille Université, CNRS, iSm2 UMR 7313, 13397 Marseille, France

<sup>4</sup> College of Life Sciences and Biotechnology, Korea University, Seoul, 136-712, South Korea

# equal contribution

\* Corresponding author. E-mail: [vgladyshev@rics.bwh.harvard.edu](mailto:vgladyshev@rics.bwh.harvard.edu)

## Supplementary Results

### Table of contents

|                              |                                                                                                                                   |           |
|------------------------------|-----------------------------------------------------------------------------------------------------------------------------------|-----------|
| <b>Supplementary Fig. 1</b>  | MetSOx DNA and protein sequences.                                                                                                 | <b>3</b>  |
| <b>Supplementary Fig. 2</b>  | MetROx DNA and protein sequences.                                                                                                 | <b>4</b>  |
| <b>Supplementary Fig. 3</b>  | Absorbance spectra of MetSOx and MetROx and fluorescence spectra of C25S MetSOx and C129S MetROx.                                 | <b>5</b>  |
| <b>Supplementary Fig. 4</b>  | Spectra of MetSOx and MetROx incubated with MetO-containing substrates.                                                           | <b>6</b>  |
| <b>Supplementary Fig. 5</b>  | Redox characterization of MetSOx and MetROx.                                                                                      | <b>7</b>  |
| <b>Supplementary Fig. 6</b>  | pH-dependence of MetSOx and MetROx.                                                                                               | <b>8</b>  |
| <b>Supplementary Fig. 7</b>  | Saturation curves of MetSOx and MetROx to MetO-containing substrates.                                                             | <b>9</b>  |
| <b>Supplementary Fig. 8</b>  | Use of inactive version of MetSOx and MetROx in <i>E. coli</i> .                                                                  | <b>10</b> |
| <b>Supplementary Fig. 9</b>  | MetO calibration in <i>E. coli</i> .                                                                                              | <b>11</b> |
| <b>Supplementary Fig. 10</b> | Growth curves and MSR activity of <i>E. coli</i> Wt and <i>msr</i> mutants.                                                       | <b>12</b> |
| <b>Supplementary Fig. 11</b> | Kinetics of reactivity of <i>E. coli</i> Wt and <i>msr</i> mutants expressing MetSOx, MetROx or their inactive versions to NaOCl. | <b>13</b> |
| <b>Supplementary Fig. 12</b> | MetROx ratio changes of HEK293 cells in response to MetO and DTT.                                                                 | <b>14</b> |
| <b>Supplementary Fig. 13</b> | Variations in the MetROx and C129S MetROx ratio in different cellular compartments.                                               | <b>15</b> |
| <b>Supplementary Fig. 14</b> | MetROx ratio changes upon expression of the constitutively active MICAL1.                                                         | <b>16</b> |
| <b>Supplementary Fig. 15</b> | MetROx response to serum starvation and confluency.                                                                               | <b>17</b> |
| <b>Supplementary Table 1</b> | Spectral properties of MetSOx and MetROx.                                                                                         | <b>18</b> |
| <b>Supplementary Table 2</b> | Dose-response of MetSOx and MetROx to MetO-containing substrates.                                                                 | <b>18</b> |
| <b>Supplementary Table 3</b> | Oligonucleotides used in this study.                                                                                              | <b>19</b> |
| <b>Supplementary Table 4</b> | Plasmids used in this study.                                                                                                      | <b>20</b> |

|                                                                 |      |
|-----------------------------------------------------------------|------|
| atgtcgtcgttattttcaaaaaccattaagtatgatccagccaaggataaattaatcaca    | 60   |
| M S S L I S K T I K Y D P A K D K L I T                         | 20   |
| ttagcatgtggatgtttttgggggtacagaacatatgtataggaagtatttgaatgaccgt   | 120  |
| L A C G C F W G T E H M Y R K Y L N D R                         | 40   |
| atagtggattgtaaagtaggttacgctaattggagaagagtctaaaaaggatagcccctct   | 180  |
| I V D C K V G Y A N G E E S K K D S P S                         | 60   |
| agtgtctcttataagagagtttgtggtggtgacacagattttgcggagggttttacaagta   | 240  |
| S V S Y K R V C G G D T D F A E V L Q V                         | 80   |
| tcctataatcccaaagtataactttgagagaattaactgatttcttttttagaatccat     | 300  |
| S Y N P K V I T L R E L T D F F F R I H                         | 100  |
| gactctactacatctaattcacaaggacctgataaagggtacacagtatcgcatgtggattg  | 360  |
| D P T T S N S Q G P D K G T Q Y R S G L                         | 120  |
| ttcgtcattcagatgctgattttaaagaattagccaaaataaaggaagaatggcaacca     | 420  |
| F A H S D A D L K E L A K I K E E W Q P                         | 140  |
| aaatggggtaataagattgccacagttattgaaccaatcaagaacttttacgatgctgaa    | 480  |
| K W G N K I A T V I E P I K N F Y D A E                         | 160  |
| gaataccaccagttatatatttagataagaatccacagggatattgcatgccctactcattat | 540  |
| E Y H Q L Y L D K N P Q G Y A C P T H Y                         | 180  |
| ctgagagaaatgaacgtctatatcatggccgacaagcagaagaacggcatcaaggccaac    | 600  |
| L R E M N V Y I M A D K Q K N G I K A N                         | 200  |
| ttcaagatccgccacaacgtcgaggacggcagcgtgcagctcgccgaccactaccagcag    | 660  |
| F K I R H N V E D G S V Q L A D H Y Q Q                         | 220  |
| aacacccccatcgggcgacggccccgtgctgctgcccgcacaaccactacctgagcttcag   | 720  |
| N T P I G D G P V L L P D N H Y L S F Q                         | 240  |
| tcggtcctgagcaaagacccccaacgagaagcgcgatcacatggtcctgctggagttcgtg   | 780  |
| S V L S K D P N E K R D H M V L L E F V                         | 260  |
| accgcccgcgggatcactctcggcatggacgagctgtacaacgtggatggcggttagcggt   | 840  |
| T A A G I T L G M D E L Y N V D G G S G                         | 280  |
| ggcaccggcagcaagggcgaggagctgttcaccgggggtggtgcccatcctggtcgagctg   | 900  |
| G T G S K G G E E L F T G V V P I L V E L                       | 300  |
| gacggcgacgtaaacggccacaagttcagcgtgtccggcgagggcgagggcgatgccacc    | 960  |
| D G D V N G H K F S V S G E G E G D A T                         | 320  |
| tacggcaagctgaccctgaagctgatctgcaccacggcaagctgcccgtgccctggccc     | 1020 |
| Y G K L T L K L I C T T G K L P V P W P                         | 340  |
| accctcgtgaccaccctcggtacggcctgaagtgtcttcgccgctacccccgaccacatg    | 1080 |
| T L V T T L G Y G L K C F A R Y P D H M                         | 360  |
| aagcagcagcacttcttcaagtcggccatgcccgaaggctacgtccaggagcgcaccatc    | 1140 |
| K Q H D F F K S A M P E G Y V Q E R T I                         | 380  |
| ttcttcaaggacgacggcaactacaagacccgcgcgaggtgaagttcgagggcgacacc     | 1200 |
| F F K D D G N Y K T R A E V K F E G D T                         | 400  |
| ctggtgaaccgcacatcgagctgaagggcatcggttcaaggaggacggcaacatcctgggg   | 1260 |
| L V N R I E L K G I G F K E D G N I L G                         | 420  |
| cacaagctggagtacaacatgggttactcaattcaaaactgccagcgaattcgactctgca   | 1320 |
| H K L E Y N M V T Q F K T A S E F D S A                         | 440  |
| attgctcaagacaagctagttgtcgtagattttctacgccacttggtgcggtccatctaaa   | 1380 |
| I A Q D K L V V V D F Y A T W C G P S K                         | 460  |
| atgattgctccaatgattgaaaaattctctgaacaataccacaagctgatttctataaa     | 1440 |
| M I A P M I E K F S E Q Y P Q A D F Y K                         | 480  |
| ttggatgtcgaattgggtgatgttgacaaaagaatgaagtttcgctatgccaaact        | 1500 |
| L D V D E L G D V A Q K N E V S A M P T                         | 50   |
| ttgcttctattcaagaacggtaaggaagttgcaaaggttggttggtgccaaaccagcggt    | 1560 |
| L L L F K N G K E V A K V V G A N P A A                         | 520  |
| attaagcaagccattgctgctaattgcttaa                                 | 1590 |
| I K Q A I A A N A -                                             | 529  |

**Supplementary Fig. 1. MetSOx DNA and protein sequences.**

MSRA, cpYFP and Trx1 moieties are highlighted in *blue*, *yellow* and *grey*, respectively.

|                                                                |      |
|----------------------------------------------------------------|------|
| atgaagagcaagaaaatgagtgacgaatcgaatgacgtgaagtggaacgatgccctgaca   | 60   |
| M K S K K M S D E S N D V K W N D A L T                        | 20   |
| ccattgcagctgatgggtgctgagagataaggccactgaaaggcccaacaccgggtgcgtat | 120  |
| P L Q L M V L R D K A T E R P N T G A Y                        | 40   |
| ttacacaccaacgagtcggtgtctaccattgtgccaactgcgacagaccgttgattcg     | 180  |
| L H T N E S G V Y H C A N C D R P L Y S                        | 60   |
| agcaaggccaagttcgacgctcgttggtggatggcccgacattctacgaagaggtatcccct | 240  |
| S K A K F D A R C G W P A F Y E E V S P                        | 80   |
| ggagccatcacatatcatcgtgacaattctttaatgcctgcgaggggtggagatatgttgt  | 300  |
| G A I T Y H R D N S L M P A R V E I C C                        | 100  |
| gcaaggtgtggtggacacttgggacatgtgtttgaaggtgaaggctggaacagttgcta    | 360  |
| A R C G G G H L G H V F E G E G W K Q L L                      | 120  |
| aacttgcccaaggacaccagacactgtgtgaacagtgcgctctttaaacctcaagaaggat  | 420  |
| N L P K D T R H C V N S A S L N L K K D                        | 140  |
| aacgtctatatcatggccgacaagcagaagaacggcatcaaggccaacttcaagatccgc   | 480  |
| N V Y I M A D K Q K N G I K A N F K I R                        | 160  |
| cacaacgtcgaggacggcagcgtgcagctcgcggaccactaccagcagaacacccccatc   | 540  |
| H N V E D G S V Q L A D H Y Q Q N T P I                        | 180  |
| ggcgacggccccgtgctgctgcccgacaaccactacctgagcttccagtcctgctgagc    | 600  |
| G D G P V L L P D N H Y L S F Q S V L S                        | 200  |
| aaagaccccaacgagaagcgcgatcacatggtcctgctggagttcgtgaccgcccgggg    | 660  |
| K D P N E K R D H M V L L E F V T A A G                        | 220  |
| atcactctcggcatggacgagctgtacaacgtggatggcggttagcggtggcaccggcagc  | 720  |
| I T L G M D E L Y N V D G G S G G T G S                        | 240  |
| aagggcgaggagctgttcaccgggggtggtgcccatcctggtcgagctggacggcgacgta  | 780  |
| K G E E L F T G V V P I L V E L D G D V                        | 260  |
| aacggccacaagttcagcgtgtccggcgagggcgagggcgatgccacctacggcaagctg   | 840  |
| N G H K F S V S G E G E G D A T Y G K L                        | 280  |
| accctgaagctgatctgcaccaccggcaagctgcccgtgccctggcccaccctcgtgacc   | 900  |
| T L K L I C T T G K L P V P W P T L V T                        | 300  |
| accctcgggtacggcctgaagtgtcttcgcccgtaccccgaccacatgaagcagcacgac   | 960  |
| T L G Y G L K C F A R Y P D H M K Q H D                        | 320  |
| ttcttcaagtccgccatgcccggaaggctacgtccaggagcgcaccatcttcttcaaggac  | 1020 |
| F F K S A M P E G Y V Q E R T I F F K D                        | 340  |
| gacggcaactacaagaccgcgcgaggtgaagttcgagggcgacaccctggtgaaccgc     | 1080 |
| D G N Y K T R A E V K F E G D T L V N R                        | 360  |
| atcgagctgaagggcatcggttcaaggaggacggcaacatcctggggcacaagctggag    | 1140 |
| I E L K G I G F K E D G N I L G H K L E                        | 380  |
| tacaacatgtcctcatcacaccagtattactaaattgacgaacctaacagaatttaggaat  | 1200 |
| Y N M S S Y T S I T K L T N L T E F R N                        | 400  |
| ttgatcaagcaaaatgataaactagtcatcgatttttatgctacttgggtgtggcccctct  | 1260 |
| L I K Q N D K L V I D F Y A T W C G P S                        | 420  |
| aagatgatgcaaccacacttaacgaaattaattcaggccttatccagatgtaagatttgtc  | 1320 |
| K M M Q P H L T K L I Q A Y P D V R F V                        | 440  |
| aagtgcgacgtggacgaatcaccagatattgccaaagagtgtgaagtgcggctatgcc     | 1400 |
| K C D V D E S P D I A K E C E V T A M P                        | 460  |
| acctttgttcttggcaaggatggccaactcatcggaagatcattggagctaaccctact    | 1460 |
| T F V L G K D G L I G K I I G A N P T                          | 480  |
| gctttagagaagggaatcaaagatctataa                                 | 1490 |
| A L E K G I K D L -                                            | 489  |

**Supplementary Fig. 2. MetROx DNA and protein sequences.**

MSRB, cpYFP and Trx3 moieties are highlighted in *red*, *yellow* and *dark grey*, respectively.

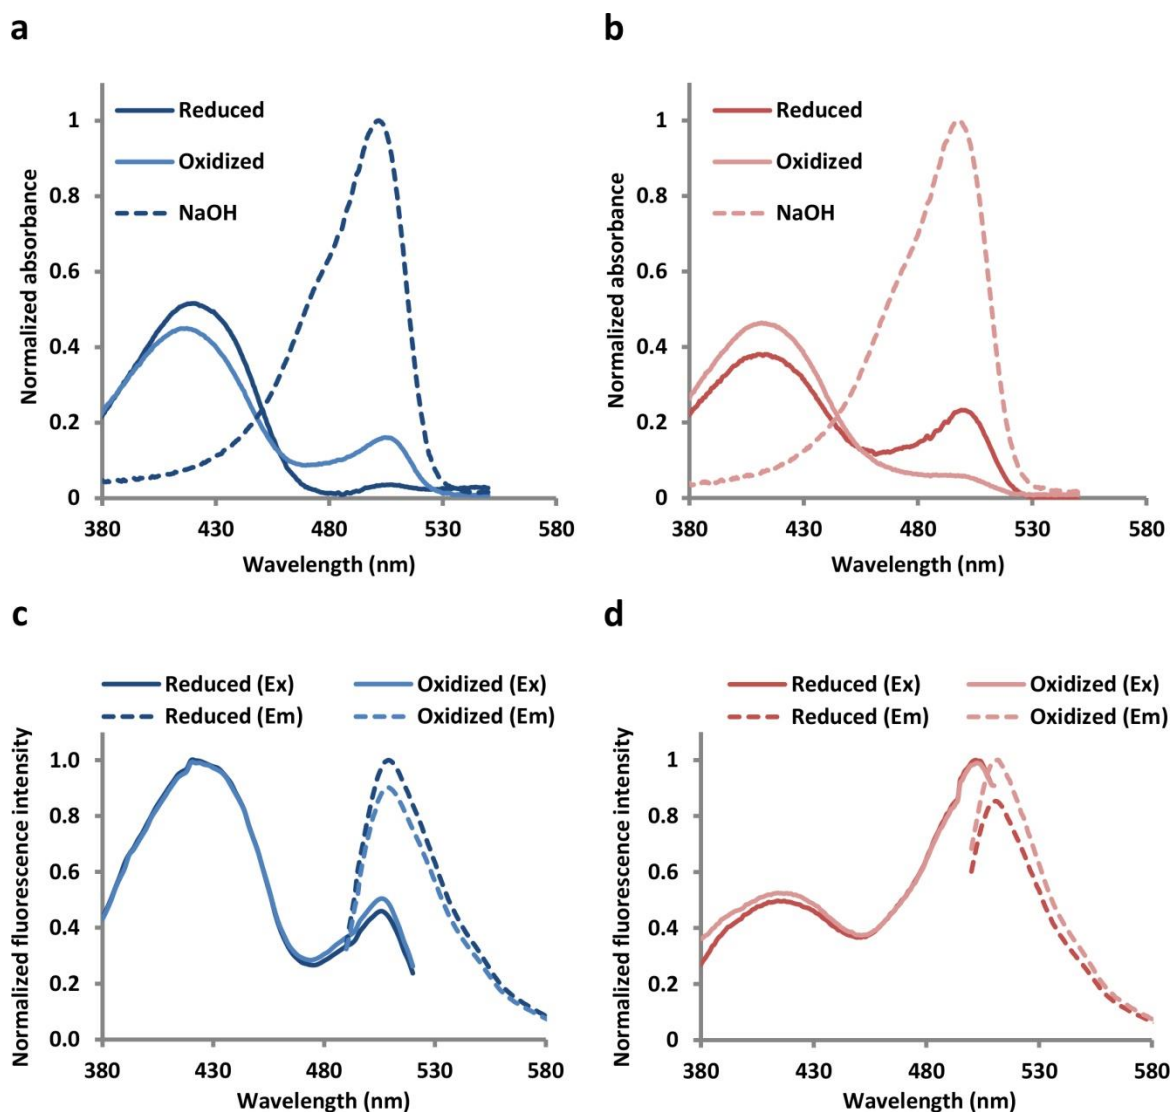

**Supplementary Fig. 3. Absorbance spectra of MetSOx and MetROx and fluorescence spectra of C25S MetSOx and C129S MetROx.**

(a) Absorbance spectra of reduced, oxidized and denatured MetSOx. Extinction coefficients for absorbance at 425 and 505 nm (or 500 nm for denatured) were estimated by measuring absorbance spectra at 3 protein concentrations. (b) Absorbance spectra of reduced, oxidized and denatured MetROx. Extinction coefficients for absorbance at 410 and 500 nm were estimated by measuring absorbance spectra at 3 protein concentrations. (c) Excitation (Ex) (*full line*) and emission (Em) (*dashed line*) spectra of reduced (*dark blue*) and oxidized inactive C25S MetSOx (*light blue*). Spectra were normalized to the oxidized form. (d) Excitation (Ex) (*full line*) and emission (Em) (*dashed line*) spectra of reduced (*dark red*) and oxidized inactive C129S MetROx (*pink*). Spectra were normalized to the reduced form. Sensors were reduced with 10 mM DTT and oxidized with 10  $\mu$ M MRP4.

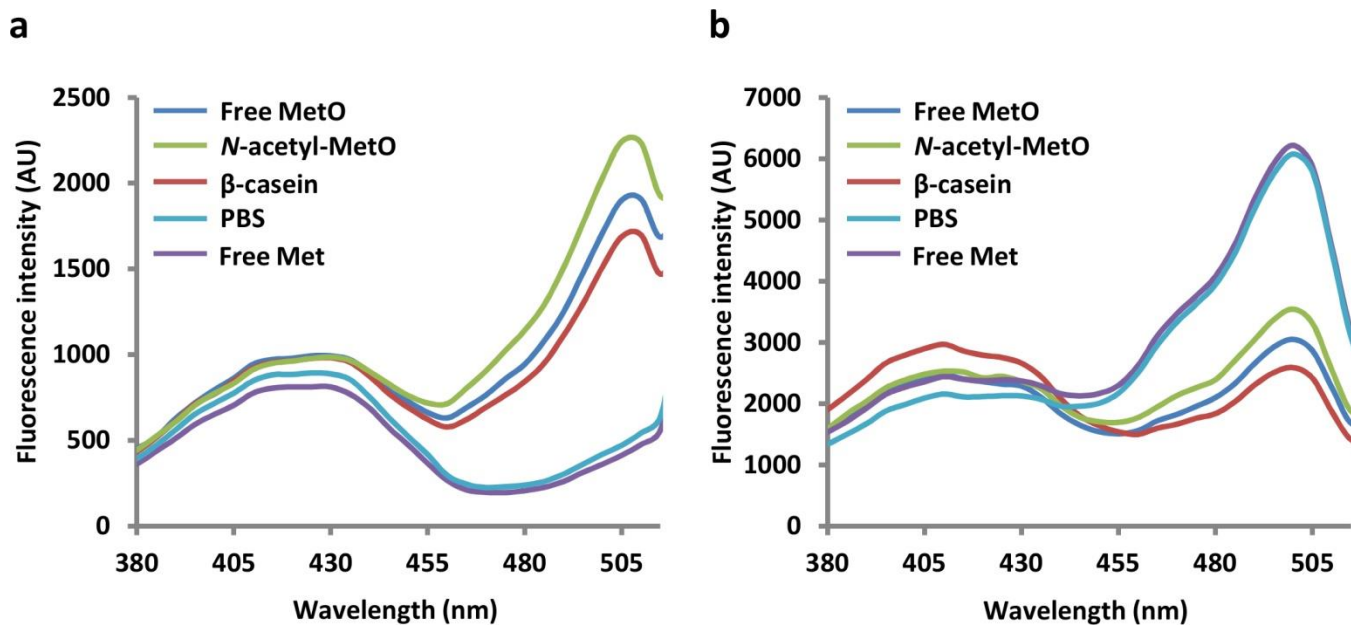

**Supplementary Fig. 4. Spectra of MetSOx and MetROx incubated with MetO-containing substrates.**

Excitation spectra of MetSOx (a) and MetROx (b) with various MetO-containing substrates. Reduced sensors (1  $\mu\text{M}$ ) were incubated with free L-Met-*R,S*-O (100  $\mu\text{M}$ ), oxidized  $\beta$ -casein (10  $\mu\text{M}$ ), *N*-acetyl-L-Met-*R,S*-O (10  $\mu\text{M}$ ), PBS or free L-Met (100  $\mu\text{M}$ ) for 1h.

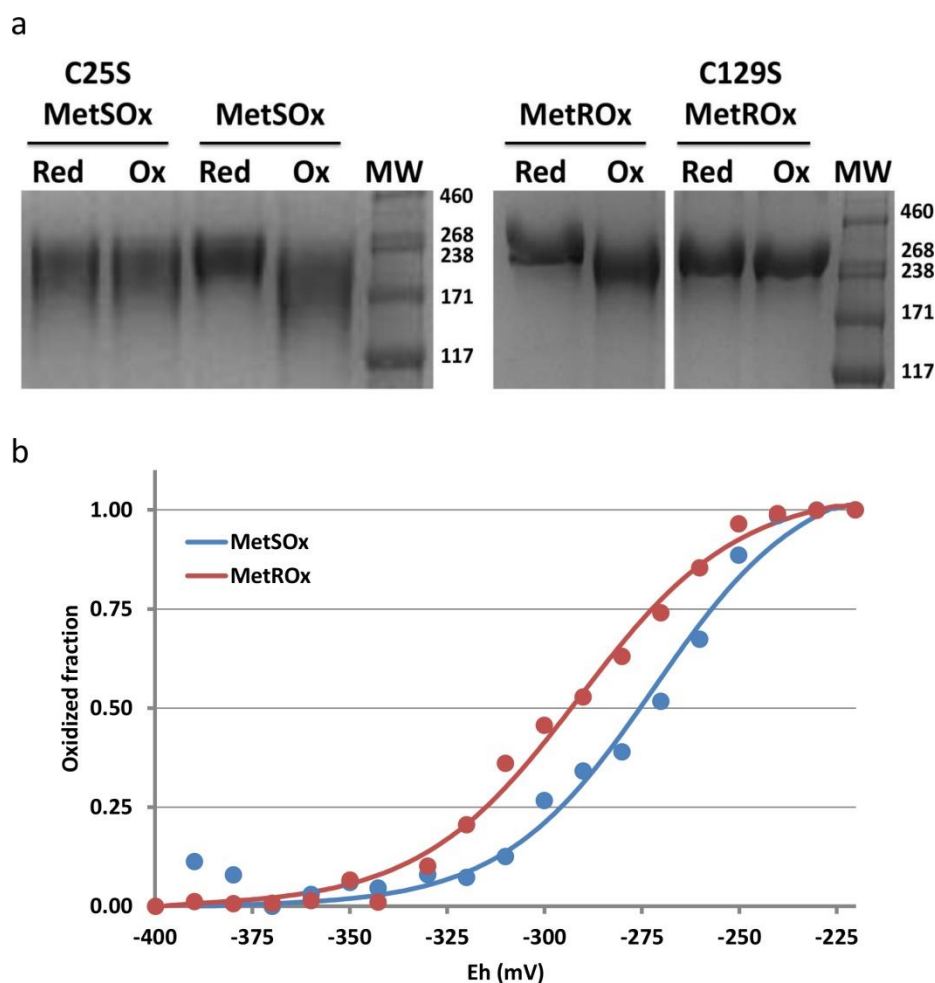

**Supplementary Fig. 5. Redox characterization of MetSOx and MetROx.**

(a) Cys alkylation assay. Reduced or oxidized MetSOx (left panel) and MetROx (right panel), and their inactive versions were alkylated with Mal-PEG and loaded on 7% Tris-Acetate gels. Mal-PEG added 5 kDa per alkylated Cys. (b) Redox midpoints of MetSOx and MetROx at pH 7.0 were determined by fluorescence measurements after incubation of oxidized sensors with mixture of oxidized and reduced DTT (10 mM) at defined  $E_h$ . The percentages of oxidized fraction as a function of  $E_h$  were fitted to the Nernst equation ( $n = 2$ ) using nonlinear regression.  $E_m$  values were  $-276 \pm 6$  mV and  $-293 \pm 4$  mV for MetSOx and MetROx, respectively. Data presented are representative of 3 replicates.

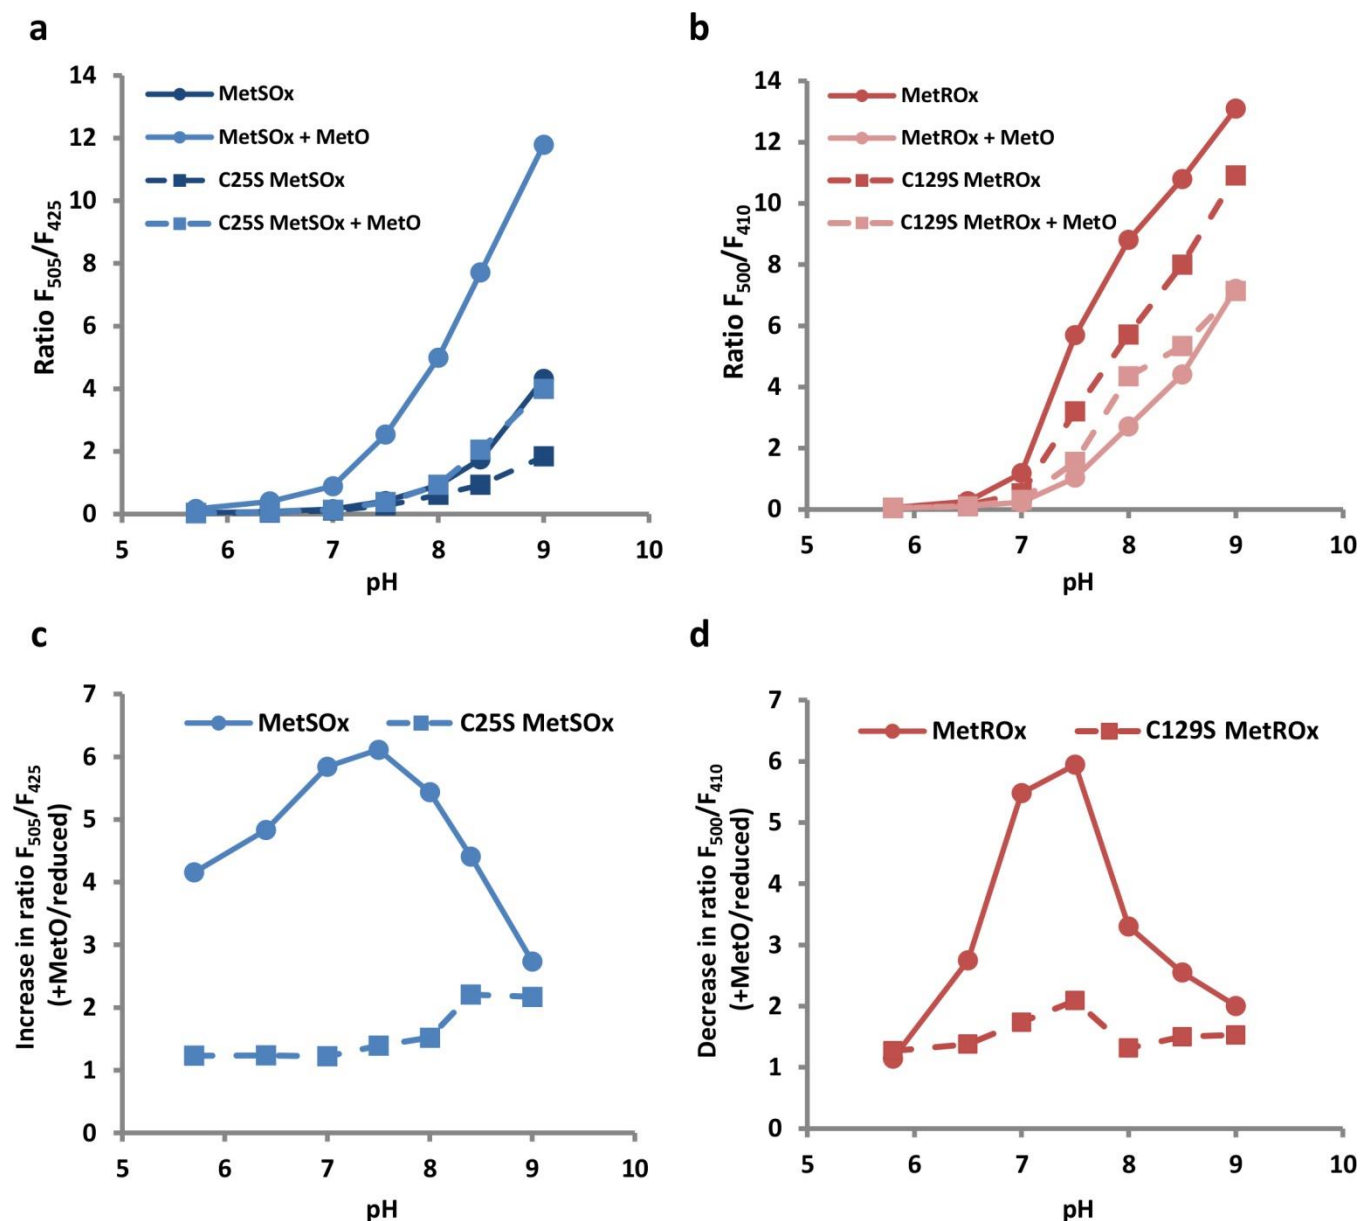

**Supplementary Fig. 6. pH-dependence of MetSOx and MetROx.**

The ratio and dynamic range of MetSOx and its inactive C25S MetSOx form as a function of pH (**a**, **c**). Dynamic range was calculated by dividing the measured ratio of the oxidized sensors (+MetO) by the measured ratio of the reduced sensors. The ratio and dynamic range of MetROx and its inactive C129S MetROx form as a function of pH (**b**, **d**). Dynamic range was calculated by dividing the measured ratio of the reduced sensors by the measured ratio of the reduced sensors (+MetO).

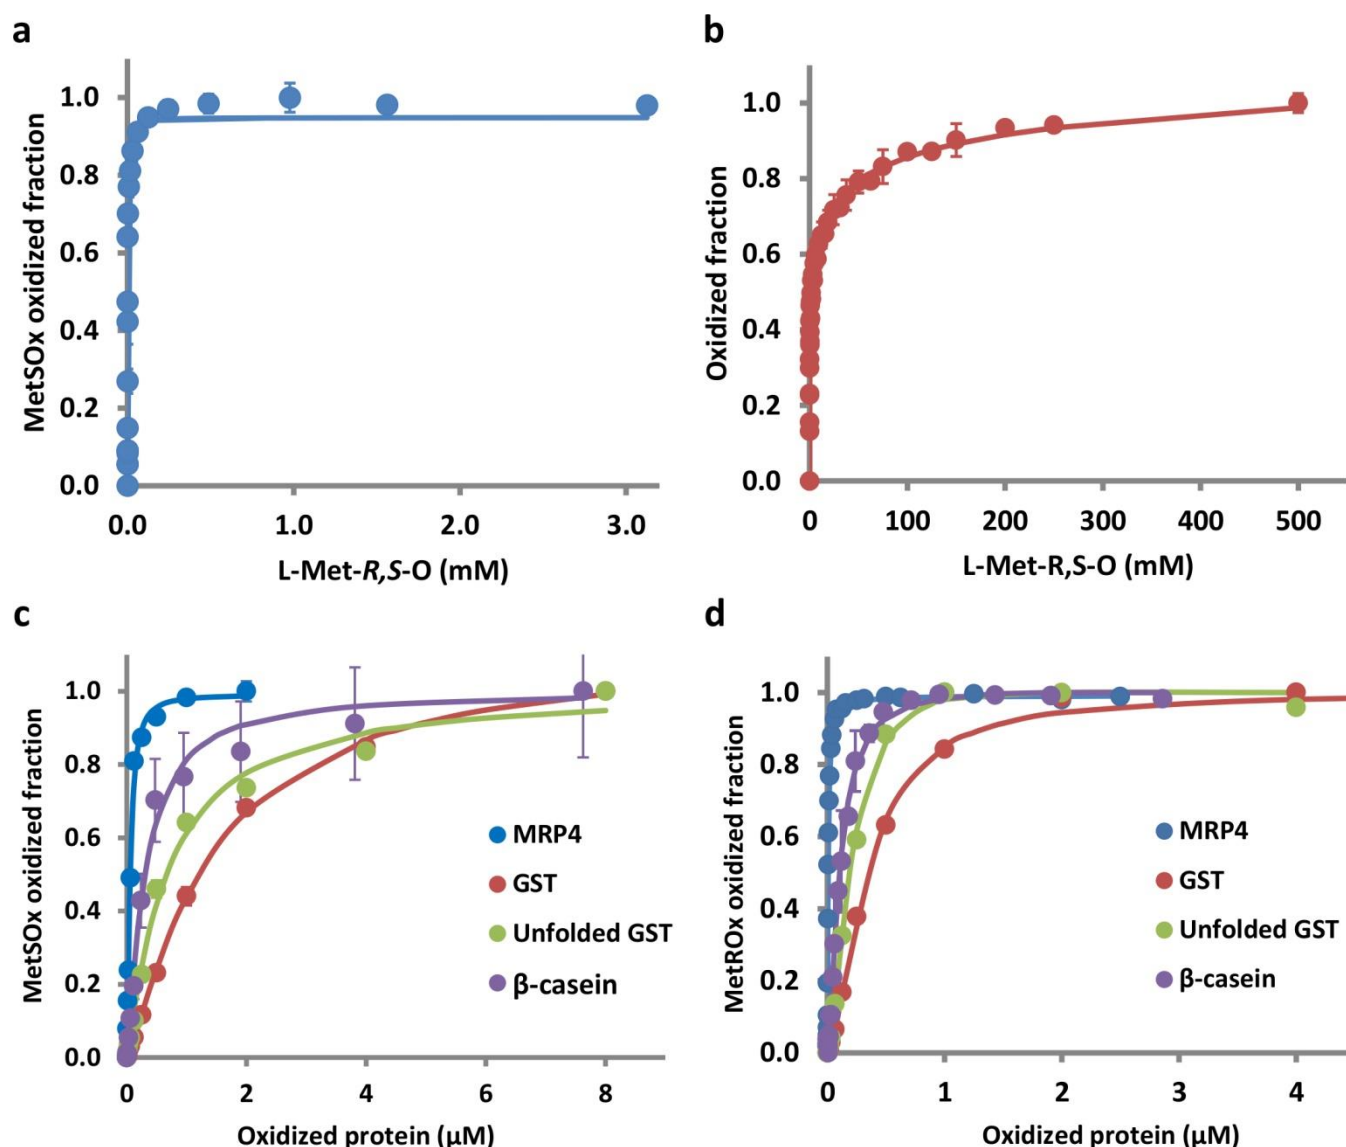

**Supplementary Fig. 7. Saturation curves of MetSOx and MetROx to MetO-containing substrates.**

Free L-Met-R,S-O dose response of MetSOx (**a**) and MetROx (**b**). MetO concentration was from 12 nM to 3 mM for MetSOx and from 24  $\mu\text{M}$  to 100 mM for MetROx. Dose responses of MetSOx (**c**) and MetROx (**d**) to oxidized proteins. Reduced MetO sensors were incubated with oxidized MRP4 (8 nM to 2  $\mu\text{M}$ ), oxidized GST (8 nM to 8  $\mu\text{M}$ ), unfolded oxidized GST (8 nM to 8  $\mu\text{M}$ ) and oxidized  $\beta$ -casein (6 nM to 7.6  $\mu\text{M}$ ) for 1h. The oxidized fraction was calculated from the ratio of fully reduced and maximal oxidation state observed. Data presented are the means ( $n = 3$ )  $\pm$  SD and are representative of 3 replicates.

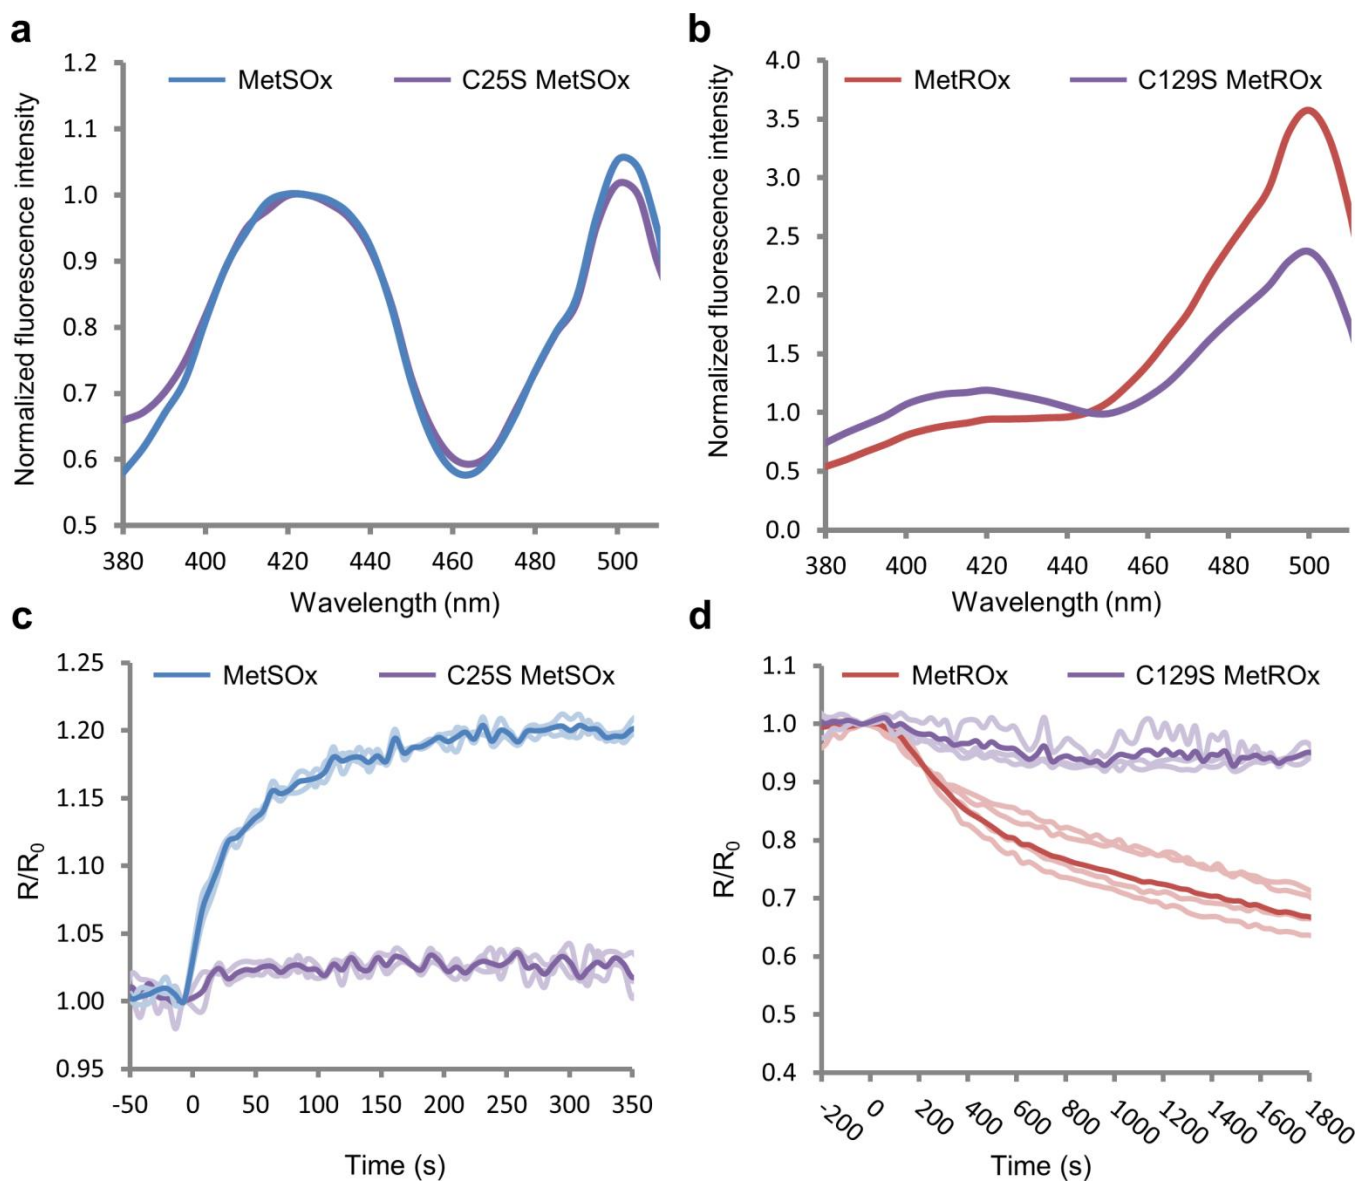

**Supplementary Fig. 8. Use of inactive version of MetSOx and MetROx in *E. coli*.**

(a) Excitation spectra of *E. coli* cells expressing MetSOx and its inactive C25S MetSOx form. Fluorescence intensity was normalized by the intensity at 425 nm. (b) Excitation spectra of *E. coli* cells expressing MetROx and its inactive C129S MetSOx form. Fluorescence intensity was normalized by the intensity at 445 nm. (c) Kinetics of the response of MetSOx and C25S MetSOx in *E. coli* suspensions to free MetO. Cells in M9 media were incubated with 125  $\mu$ M free MetO. The ratio of fluorescence  $F_{505\text{ nm}}/F_{425\text{ nm}}$  was normalized by the value at  $t = 0$  s. (d) Kinetics of the response of MetROx and C129S MetSOx in *E. coli* suspensions to free MetO. Cells in M9 media were incubated with 150  $\mu$ M free MetO. The ratio of fluorescence  $F_{500\text{ nm}}/F_{410\text{ nm}}$  was normalized by the value at  $t = 0$  s. Light and dark colors correspond to replicate measurements and average, respectively. Data presented are representative of 3 replicates.

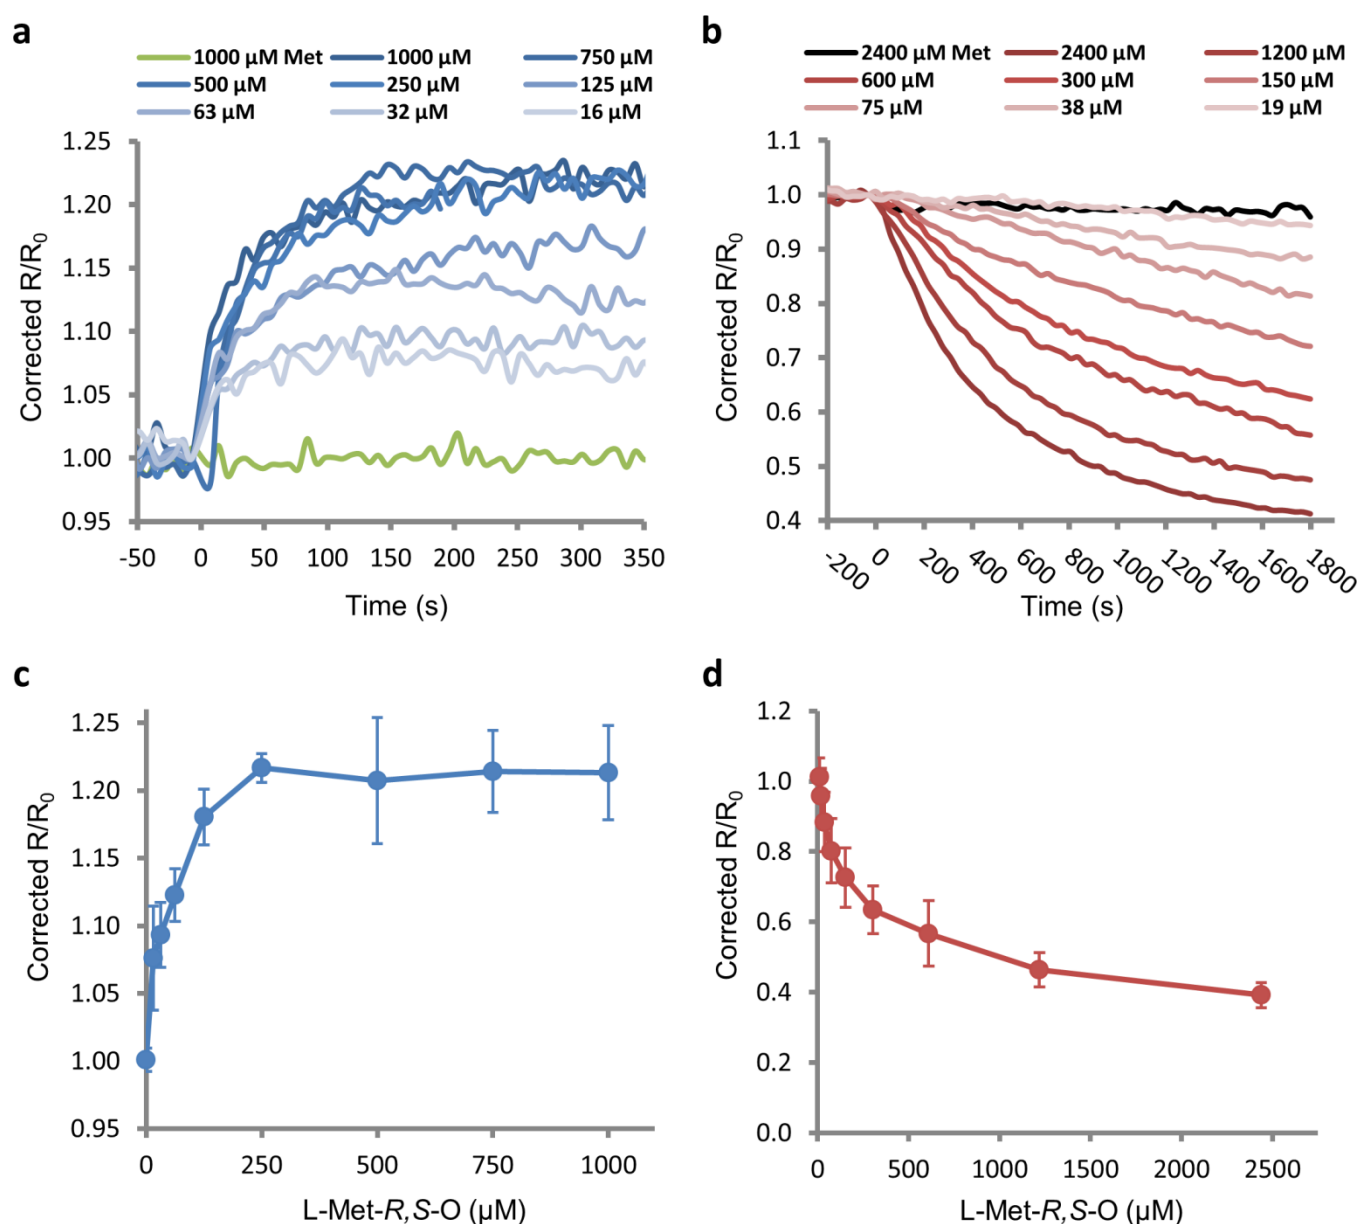

### Supplementary Fig. 9. MetO calibration in *E. coli*.

Kinetics of the response of MetSOx (**a**) and MetROx (**b**) expressed in *E. coli* to increasing concentrations of free MetO. Cells in M9 media were incubated with free MetO or free Met. The ratio of fluorescence was normalized by the value at  $t = 0$  s and corrected by the normalized ratio of the inactive sensor. This experiment was done twice (**a**) and thrice (**b**). The ratio was calculated after complete kinetics corrected by the ratio obtained with inactive sensors (panels **a** and **b**). Free L-Met-R,S-O dose response of MetSOx (**c**) and MetROx (**d**) in *E. coli*. MetO concentration was from 16  $\mu$ M to 1,000  $\mu$ M for MetSOx and from 19  $\mu$ M to 2,400  $\mu$ M for MetROx. Data presented are the means ( $n = 3$ )  $\pm$  SD.



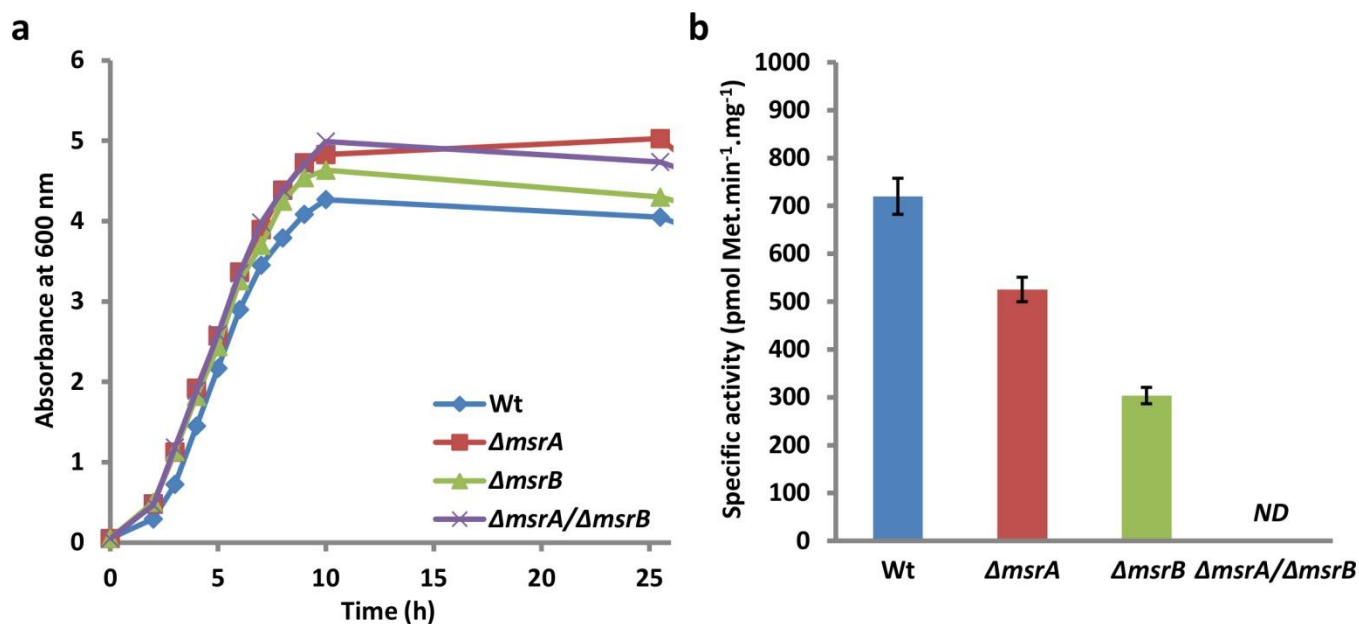

**Supplementary Fig. 10. Growth curves and MSR activity of *E. coli* Wt and *msr* mutants.**

(a) Growth curves of Wt, single  $\Delta msrA$  and  $\Delta msrB$  mutants and the double  $\Delta msrA/\Delta msrB$  mutant. Strains were grown in LB medium and absorbance values at 600 nm were recorded. (b) Total specific MSR activities of Wt and *msr* mutants. After overnight growth, total specific MSR activity was determined using dabsyl-MetO as substrate and an HPLC-based method. ND, not detected. Data presented are the means ( $n = 3$ )  $\pm$  SD and are representative of 3 replicates.

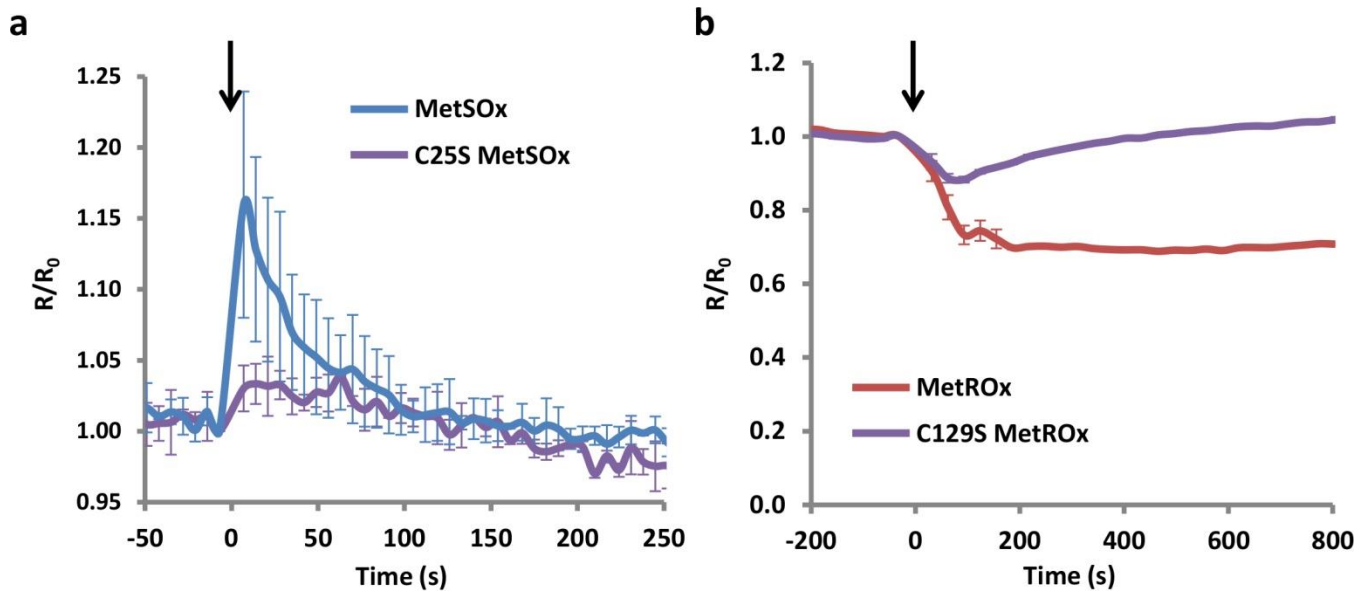

**Supplementary Fig. 11. Kinetics of reactivity of *E. coli* Wt and *msr* mutants expressing MetSOx, MetROx or their inactive versions to NaOCl.**

(a) Dynamics of the intracellular response of *E. coli* Wt mutants expressing MetSOx or C25S MetSOx to 100  $\mu$ M NaOCl. Strains were grown in LB for 20 h, rinsed and equilibrated in M9 medium, and the ratio  $F_{505\text{ nm}}/F_{425\text{ nm}}$  was recorded for cells expressing MetSOx and the inactive C25S MetROx form. (b) Dynamics of the intracellular response of *E. coli* Wt MetROx to 40  $\mu$ M NaOCl. Strains were grown in LB for 20 h, rinsed and equilibrated in M9 medium and the ratio  $F_{500\text{ nm}}/F_{410\text{ nm}}$  was recorded for cells expressing MetROx and the inactive C129S MetROx form. Data presented are the means ( $n = 3$ )  $\pm$  SD and are representative of 3 replicates.

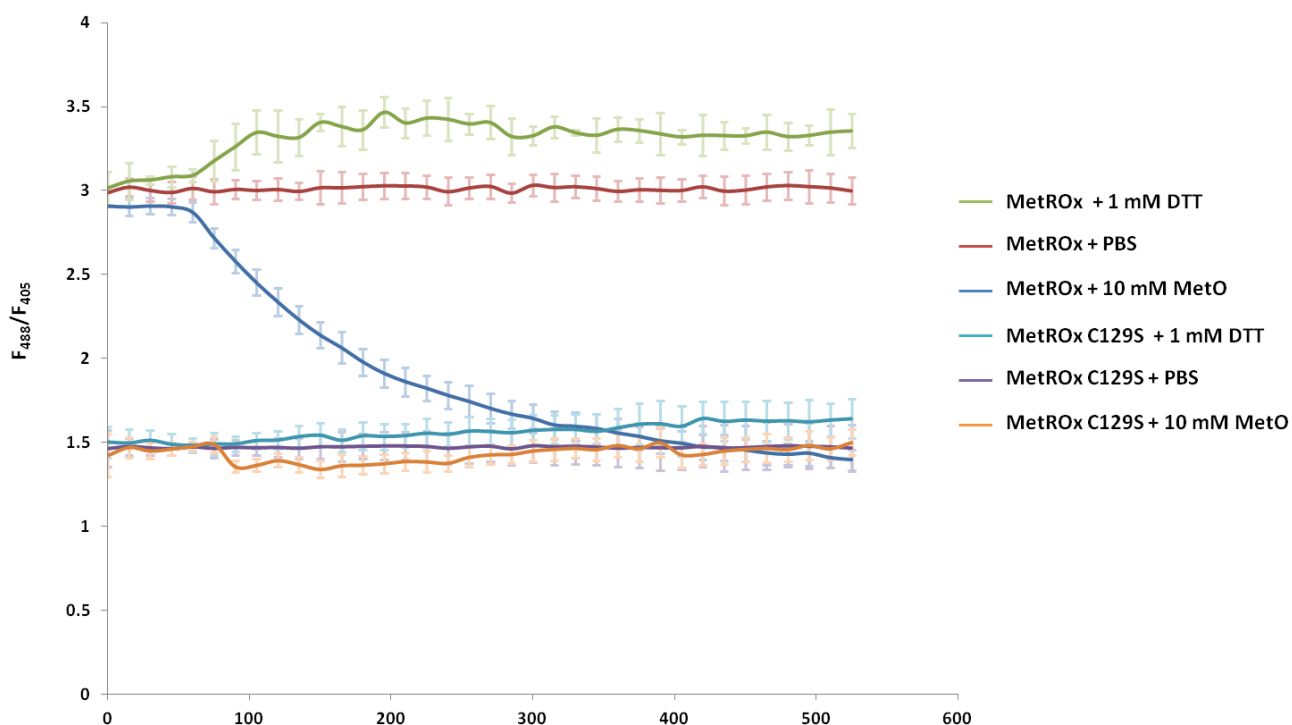

**Supplementary Fig. 12. MetROx ratio changes of HEK293 cells in response to MetO and DTT.**

HEK293 cells expressing non-targeted MetROx and MetROx C129S were subjected to 1 mM DTT or 10 mM MetO. The corrected ratio values after the equilibrium were  $\sim 1.5$  for MetO and  $\sim 3.5$  for DTT. These values represent the fully oxidized and reduced forms of the sensor in the cytosol of mammalian cells. Consistent with **Fig 6b** and by comparison with the data obtained with the recombinant sensors, and similarly to *E. coli* assays, the data allowed proposing an empiric scale wherein MetROx was half and fully oxidized with  $\sim 100 \mu\text{M}$  and  $\sim 1,000 \mu\text{M}$  Met-R-O, respectively. Data presented are the means ( $n = 5-8$ )  $\pm$  SD and are representative of 3 replicates.

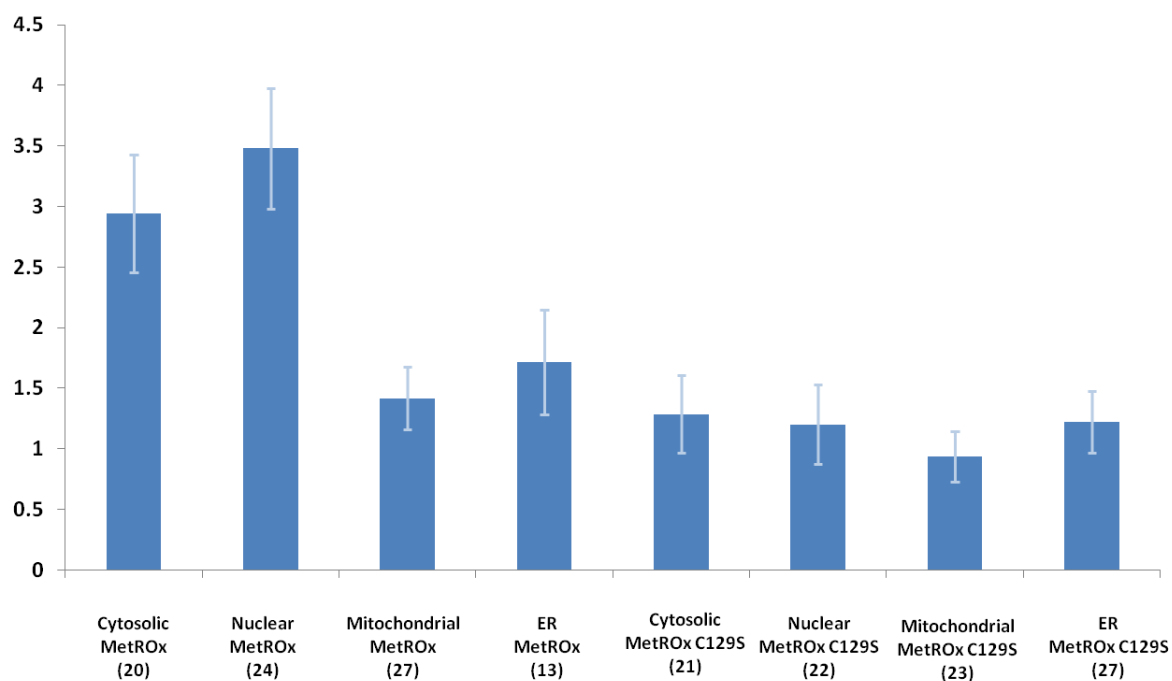

**Supplementary Fig. 13. Variation in the MetROx and C129S MetROx fluorescence ratio in different cellular compartments.**

HEK293 cells expressing MetROx or C129S MetROx constructs targeted to different cellular compartments were subjected to live cell confocal microscopy and the captured images were analyzed to calculate the MetROx ratio in different compartments. The number of cells used for the analysis is indicated in parentheses. Data presented are the means  $\pm$  SD and are representative of 3 replicates.

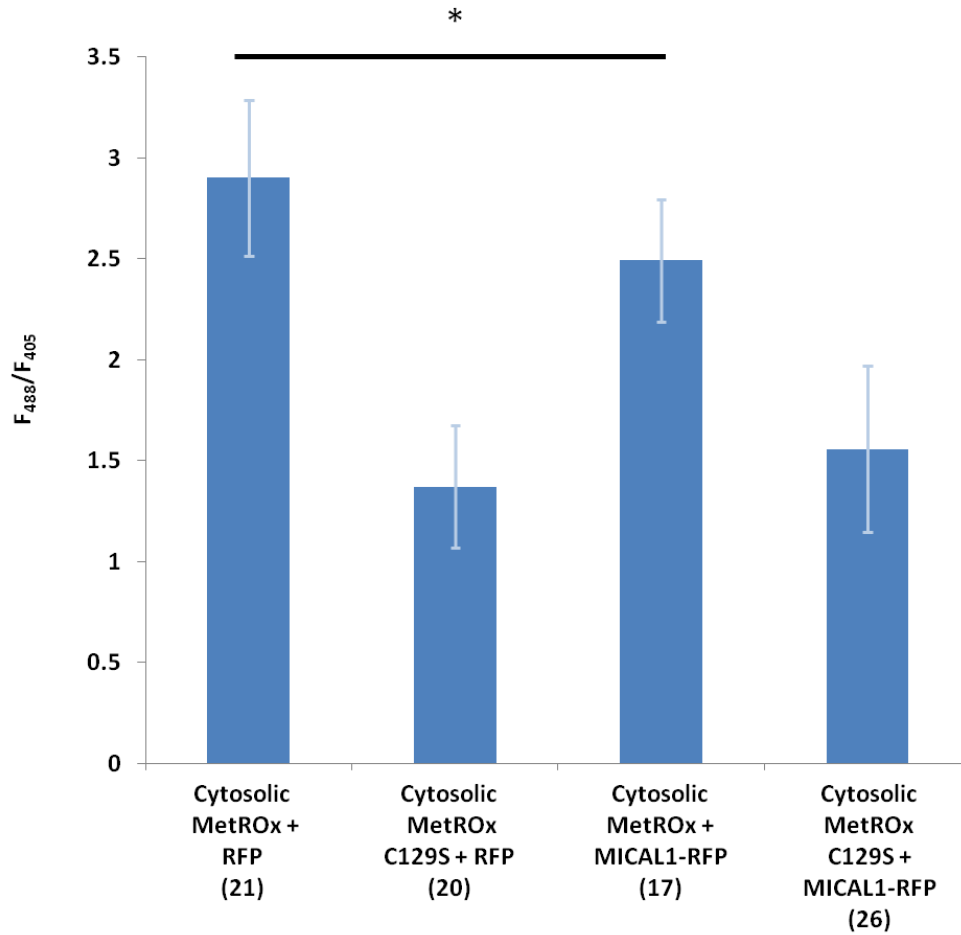

**Supplementary Fig 14. MetROx ratio changes upon expression of the constitutively active MICAL1.** Fluorescent confocal microscopy images of live HEK293 cells expressing MetROx, or C129S MetROx along with either RFP or the constitutively active MICAL1-RFP were analyzed to calculate the MetROx ratio. Expressing RFP alone altered neither the MetROx nor the inactive mutant C129S MetROx fluorescent ratio (compare values with **Supplementary Fig. 13**). The expression of the constitutively active MICAL1 caused a significant decrease in MetROx fluorescence, but left the inactive sensor unchanged. The number of cells used for the analysis is indicated in parentheses. Data presented are the means  $\pm$  SD, \*  $p < 0.05$  and are representative of 3 replicates.

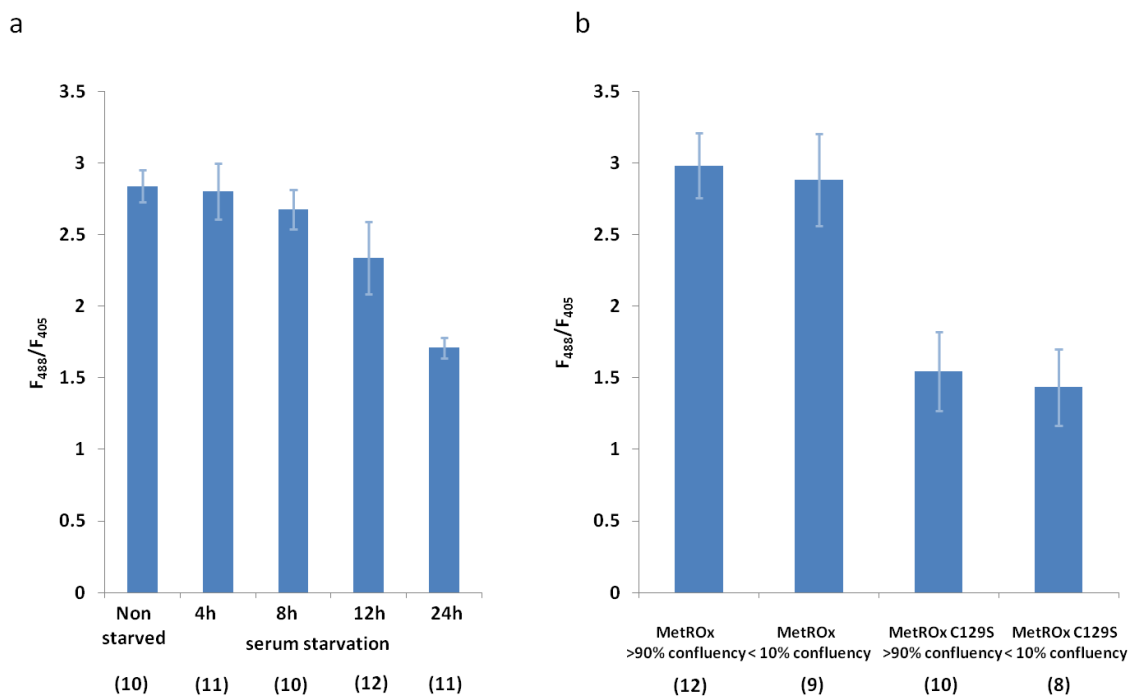

**Supplementary Fig. 15. MetROx response to serum starvation and confluency.**

**(a)** HEK293 cells expressing MetROx constructs were subjected to serum starvation for indicated time periods followed by live cell confocal microscopy, and the images were analyzed to calculate the MetROx ratio. The number of cells used for the analysis is indicated in parentheses. Data is presented as mean  $\pm$  SD. **(b)** HEK293 cells expressing MetROx and C129S MetROx were cultured at different confluency for 24 h and then subjected to live cell confocal microscopy. We did not detect any differences in the MetROx ratio below 10% and over 90% confluency. The number of cells used for the analysis is indicated in parentheses. Data presented are the means  $\pm$  SD and are representative of 3 replicates.

**Supplementary Table 1. Spectral properties of MetSOx and MetROx.**

|               | $\lambda$ Abs<br>(nm) | $\lambda$ Em<br>(nm) | Reduced                                            |                  |                                                    | Oxidized                                           |                  |                                                    |
|---------------|-----------------------|----------------------|----------------------------------------------------|------------------|----------------------------------------------------|----------------------------------------------------|------------------|----------------------------------------------------|
|               |                       |                      | $\epsilon$<br>(M <sup>-1</sup> .cm <sup>-1</sup> ) | Quantum<br>yield | Brightness<br>(M <sup>-1</sup> .cm <sup>-1</sup> ) | $\epsilon$<br>(M <sup>-1</sup> .cm <sup>-1</sup> ) | Quantum<br>yield | Brightness<br>(M <sup>-1</sup> .cm <sup>-1</sup> ) |
| <i>MetSOx</i> |                       |                      |                                                    |                  |                                                    |                                                    |                  |                                                    |
|               | 425                   | 510                  | 20,700                                             | 0.08             | 1,600                                              | 17,700                                             | 0.08             | 1,400                                              |
|               | 505                   | 516                  | 1,300                                              | 0.81             | 1,000                                              | 5,300                                              | 0.67             | 3,500                                              |
| <i>MetROx</i> |                       |                      |                                                    |                  |                                                    |                                                    |                  |                                                    |
|               | 410                   | 510                  | 12,500                                             | 0.15             | 1,900                                              | 15,700                                             | 0.12             | 1,800                                              |
|               | 500                   | 516                  | 5,800                                              | 0.71             | 4,100                                              | 2,200                                              | 0.67             | 1,500                                              |

**Supplementary Table 2. Dose-response of MetSOx and MetROx to MetO-containing substrates.**

|               | Apparent<br>stoichiometry <sup>a</sup><br><br>(mol of MetO<br>reduced, mol<br>sub <sup>-1</sup> ) | <i>K</i> <sub>0.5</sub><br>(μM) | Corrected <i>K</i> <sub>0.5</sub> <sup>b</sup><br>(μM of MetO) | Concentration range                                            |                                                                   |              |
|---------------|---------------------------------------------------------------------------------------------------|---------------------------------|----------------------------------------------------------------|----------------------------------------------------------------|-------------------------------------------------------------------|--------------|
|               |                                                                                                   |                                 |                                                                | Minimum concentration<br>(for oxidized fraction =<br>0.1) (μM) | Maximum<br>concentration (for<br>oxidized fraction = 0.9)<br>(μM) | Max /<br>Min |
| <i>MetSOx</i> |                                                                                                   |                                 |                                                                |                                                                |                                                                   |              |
| Free MetO     | 0.5                                                                                               | 0.985 ± 0.085                   | 0.492 ± 0.043                                                  | 0.115                                                          | 18.000                                                            | 157          |
| MRP4          | 4.16 ± 0.16                                                                                       | 0.025 ± 0.004                   | 0.105 ± 0.019                                                  | 0.003                                                          | 0.250                                                             | 83           |
| GST           | 1.21 ± 0.02                                                                                       | 1.914 ± 0.156                   | 2.13 ± 0.176                                                   | 0.169                                                          | 4.840                                                             | 29           |
| Unfolded GST  | 3.25 ± 0.05                                                                                       | 1.392 ± 0.187                   | 4.524 ± 0.608                                                  | 0.082                                                          | 4.445                                                             | 55           |
| β-casein      | 2.49 ± 0.15                                                                                       | 0.343 ± 0.045                   | 0.854 ± 0.112                                                  | 0.037                                                          | 2.440                                                             | 66           |
| <i>MetROx</i> |                                                                                                   |                                 |                                                                |                                                                |                                                                   |              |
| Free MetO     | 0.5                                                                                               | 352.900 ±<br>63.690             | 176.450 ± 31.845                                               | 2.100                                                          | 165.000x10 <sup>3</sup>                                           | 78,571       |
| MRP4          | 7.18 ± 0.66                                                                                       | 0.006 ± 0.001                   | 0.043 ± 0.007                                                  | 6.700x10 <sup>-4</sup>                                         | 0.054                                                             | 80           |
| GST           | 0.78 ± 0.02                                                                                       | 0.521 ± 0.082                   | 0.406 ± 0.064                                                  | 0.043                                                          | 1.900                                                             | 44           |
| Unfolded GST  | 4.66 ± 0.24                                                                                       | 0.779 ± 0.090                   | 3.631 ± 0.418                                                  | 0.029                                                          | 1.085                                                             | 38           |
| β-casein      | 3.19 ± 0.34                                                                                       | 0.136 ± 0.016                   | 0.434 ± 0.050                                                  | 0.013                                                          | 0.555                                                             | 42           |

<sup>a</sup> Apparent stoichiometries with the MSR moiety were previously calculated<sup>26</sup>. <sup>b</sup>  $K_{0.5}$  were corrected by multiplication with apparent stoichiometry to remove the variation due to the different numbers of MetO reduced in each substrate. Data presented are the means (n = 3)  $\pm$  SD.

**Supplementary Table 3. Oligonucleotides used in this study.**

| #  | Name             | Sequence                                                                            | Purpose                                                                                                |
|----|------------------|-------------------------------------------------------------------------------------|--------------------------------------------------------------------------------------------------------|
| 1  | MSRA_cpYFP_For   | 5'-cattatctgagagaatgaacgtctatatcatggc-3'                                            | Fuse MSRA to cpYFP                                                                                     |
| 2  | MSRA_cpYFP_Rev   | 5'-gccatgatatagacgttcatttctctcagataatg-3'                                           |                                                                                                        |
| 3  | cpYFP_Trx1_For   | 5'-caagctggagtacaacatggttactcaattcaaaactgc-3'                                       | Fuse cpYFP to Trx1                                                                                     |
| 4  | cpYFP_Trx1_Rev   | 5'-gcagttttgaattgagtaaccatgtgtactccagcttg-3'                                        |                                                                                                        |
| 5  | MSRB_cpYFP_For   | 5'-gtctttaaacctcaagaaggataacgtctatatcatggcc-3'                                      | Fuse MSRB to cpYFP                                                                                     |
| 6  | MSRB_cpYFP_Rev   | 5'-ggccatgatatagacgttatccttcttgagggttaaagac-3'                                      |                                                                                                        |
| 7  | cpYFP_Trx3_For   | 5'-gcacaagctggagtacaacatgtcctcataccag-3'                                            | Fuse cpYFP to Trx3                                                                                     |
| 8  | cpYFP_Trx3_Rev   | 5'-ctggtgtatgaggacatgtgtactccagcttgtgc-3'                                           |                                                                                                        |
| 9  | MetSOx_BamHI_For | 5'-ctctatctggatccatgtcgtcgttatttc-3'                                                | Clone MetSOx in pGEX-4T1                                                                               |
| 10 | MetSOx_NorI_Rev  | 5'-atatttatgcggccgcttaagcattagcagc-3'                                               |                                                                                                        |
| 11 | MetROx_BamHI_For | 5'-cacacacaggatccaagagcaagaaaatg-3'                                                 | Clone MetROx in pGEX-4T1                                                                               |
| 12 | MetROx_NorI_Rev  | 5'-atatttatgcggccgcttaagcattagcagc-3'                                               |                                                                                                        |
| 13 | MetSOx_C25S_For  | 5'-cacattagcatgtggatcttttgggggtac-3'                                                | Cys 25 to Ser site directed mutagenesis (MSRA moiety)                                                  |
| 14 | MetSOx_C25S_Rev  | 5'-gtaccccaaaaagatccacatgctaattgtg-3'                                               |                                                                                                        |
| 15 | MetSOx_C459S_For | 5'-ccacttggtgcgggtccatctaaaatgattg-3'                                               | Cys 459 to Ser site directed mutagenesis (Trx1 moiety)                                                 |
| 16 | MetSOx_C459S_Rev | 5'-caatcattttatagtgaccgcaccaagtgg-3'                                                |                                                                                                        |
| 17 | MetROx_C129S_For | 5'-caccagacactctgtgaacagtgcgtc-3'                                                   | Cys 129 to Ser site directed mutagenesis (MSRB moiety)                                                 |
| 18 | MetROx_C129S_Rev | 5'-gacgcactgttcacagagtgtctggtg-3'                                                   |                                                                                                        |
| 19 | MetROx_C420S_For | 5'-cttggtgtggcccctctaagatgatgc-3'                                                   | Cys 420 to Ser site directed mutagenesis (Trx3 moiety)                                                 |
| 20 | MetROx_C420S_Rev | 5'-gcacatcttagaggggccacaccaag-3'                                                    |                                                                                                        |
| 21 | EcMSRA_FRT_For   | 5'-ctatgcttccggtggcagacagacgccaattccgcca<br>attccacagtaacaattaaccctcactaaagggcg-3'  | Create FRT cassette for MSRA deletion in <i>E. coli</i>                                                |
| 22 | EcMSRA_FRT_Rev   | 5'-atgagtttatttgataaaaagcatctggtttccccgcg<br>cgatgccctgcctaatacagactcactatagggtc-3' |                                                                                                        |
| 23 | EcMSRB_FRT_For   | 5'-tcaaccgttgatttctcgccgttttcgccaatcggtaaag<br>cgtaaagaggaattaaccctcactaaagggcg-3'  | Create FRT cassette for MSRB deletion in <i>E. coli</i>                                                |
| 24 | EcMSRB_FRT_Rev   | 5'-atggctaataaaccttcggcagaagaactgaaaaaaa<br>atttgccgagattaatacagactcactatagggtc-3'  |                                                                                                        |
| 25 | EcMSRA_For       | 5'-ctatgcttccggtggcagacagac-3'                                                      | Screen MSRA deletion                                                                                   |
| 26 | EcMSRA_Rev       | 5'-atgagtttatttgataaaaagcatctggtttcccccg-3'                                         |                                                                                                        |
| 27 | EcMSRB_For       | 5'-tcaaccgttgatttctcgccgttttc-3'                                                    | Screen MSRB deletion                                                                                   |
| 28 | EcMSRB_Rev       | 5'-atggctaataaaccttcggcagaagaactg-3'                                                |                                                                                                        |
| 29 | MetROx_NheI_For  | 5'-gtcagatacgctagcatgaagagcaagaaaatg-3'                                             | Clone MetROx in pEGFP-C3 for cytosolic localization                                                    |
| 30 | MetROx_BamHI_Rev | 5'-ctagacccggcggtatccttatagatctttg-3'                                               |                                                                                                        |
| 31 | Mito_MetROx_For  | 5'-ccaagatccattcgttgaagagcaagaaaatgag-3'                                            | Fuse Cytochrome C oxidase subunit VIII mitochondrial targeting sequence to MetSOx (with Mito_NheI_For) |
| 32 | Mito_MetROx_Rev  | 5'-ctcattttctgtcttcaacgaatggatcttgg-3'                                              |                                                                                                        |

**Supplementary Table 3 (continued). Oligonucleotides used in this study.**

|    |                                  |                                                   |                                                                                                             |
|----|----------------------------------|---------------------------------------------------|-------------------------------------------------------------------------------------------------------------|
| 33 | ER_MetROx_For                    | 5'-ccacctccgccaccaagagcaagaaaatgag-3'             | Fuse SelM endoplasmic reticulum targeting sequence to MetROx (with ER_ <i>NheI</i> _For)                    |
| 34 | ER_MetROx_Rev                    | 5'-ctcattttctgtcttggggcggagggtgg-3'               |                                                                                                             |
| 35 | MetROx_ER_ <i>Bam</i> HI_R<br>ev | 5'-attattattggatccttacagctcgtccttagatctttgattc-3' | Add KDEL peptide and clone MetROx in pEGFP-C3 for endoplasmic reticulum localization                        |
| 36 | MetROx_Nucleus_For               | 5'-gggaatcaaagatctagatccaaaaagaag-3'              | Add nuclear localization signal (NLS) from SV40 large T antigen to MetSOx (with Nucleus_ <i>Bam</i> HI_Rev) |
| 37 | MetROx_Nucleus_Rev               | 5'-cttctttttggatctagatctttgattccc-3'              |                                                                                                             |

**Supplementary Table 4. Plasmids used in this study.**

| Name                  | Description                                                           |
|-----------------------|-----------------------------------------------------------------------|
| pGEX-MetSOx           | Expression of MetSOx in <i>Escherichia coli</i>                       |
| pGEX-C25S MetSOx      | Expression of inactive C25S MetSOx in <i>Escherichia coli</i>         |
| pGEX-MetROx           | Expression of MetROx in <i>Escherichia coli</i>                       |
| pGEX-C129S MetROx     | Expression of inactive C129S MetROx in <i>Escherichia coli</i>        |
| pCyto-MetROx          | Expression of MetROx in cytosol of mammalian cell                     |
| pCyto-C129S MetROx    | Expression of inactive C129S MetROx in cytosol of mammalian cell      |
| pMito-MetROx          | Expression of MetROx in mitochondria of mammalian cell                |
| pMito-C129S MetROx    | Expression of inactive C129S MetROx in mitochondria of mammalian cell |
| pNucleus-MetROx       | Expression of MetROx in nucleus of mammalian cell                     |
| pNucleus-C129S-MetROx | Expression of inactive C129S-MetROx in nucleus of mammalian cell      |
| pER-MetROx            | Expression of MetROx in ER of mammalian cell                          |
| pER-C129S-MetROx      | Expression of inactive C129S-MetROx in ER of mammalian cell           |
